# Supplementary material
Source: PubMed Central journal article supplement (PMC2719133)
Supplement: pp.109.140483_1.pdf [file pp.109.140483_1.pdf]

A

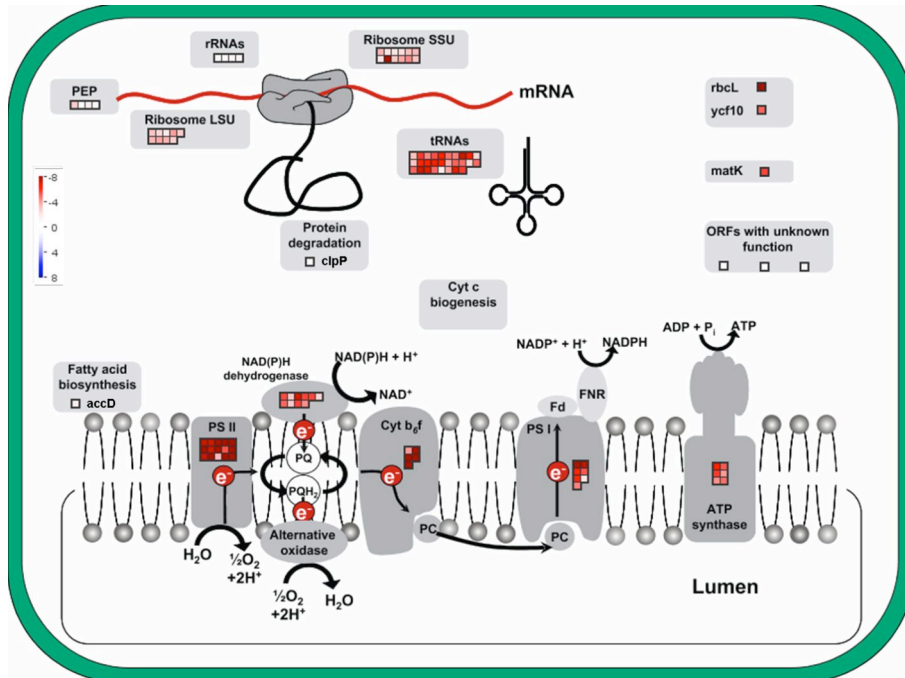

B

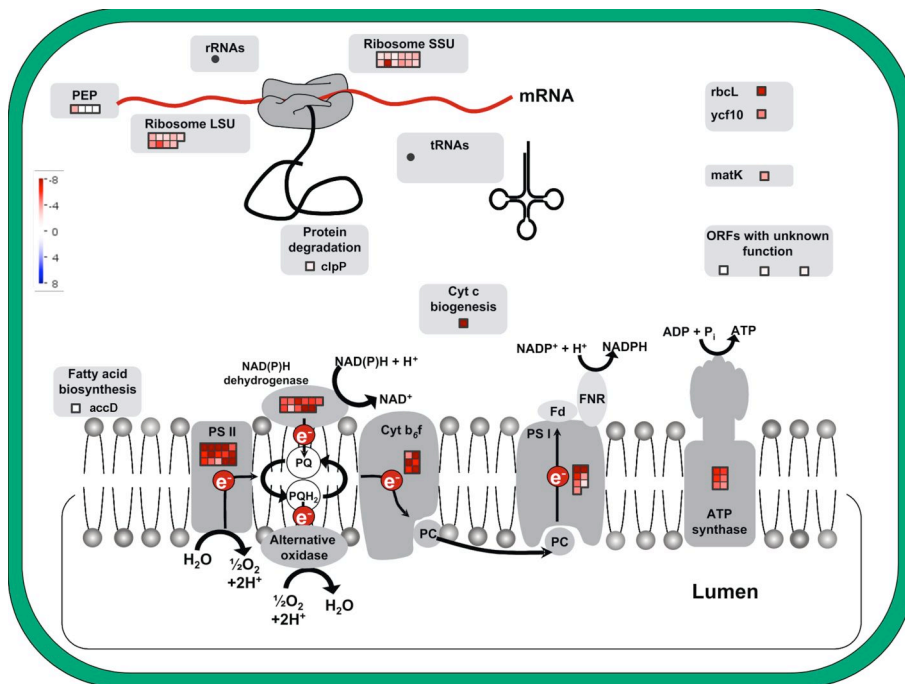

**Figure S1.** Graphical presentation of results from array experiments using the MapMan software (Thimm et al., 2004). Red and blue colors indicate down- and up-regulation of gene expression. For each gene, expression is displayed in log<sub>2</sub> tuber/leaf signal ratio. A, Oligo array hybridizations with Cy3-labeled total RNA from potato tubers and leaves. B, Oligo array hybridizations with Cy3-labeled polysome-associated mRNA from potato tubers and leaves.

**Table S1.** Data from microarray analysis with total RNA. Results are ranked according to gene function and decreasing log<sub>2</sub> Tuber/Leaf value.

| Gene            | Group          | Complexes (code) <sup>a</sup> | Operons (code) <sup>b</sup> | Average Leaf <sup>c</sup> | Average Tuber <sup>c</sup> | Log <sub>2</sub> T/L | Significance FDR Test <sup>d</sup> |
|-----------------|----------------|-------------------------------|-----------------------------|---------------------------|----------------------------|----------------------|------------------------------------|
| <i>psbN</i>     | Photosynthesis | PSII (1)                      | -                           | 1323,65                   | 127,61                     | -3,37                | *                                  |
| <i>psbJ</i>     | Photosynthesis | PSII (1)                      | 2                           | 1040,57                   | 25,78                      | -5,34                | *                                  |
| <i>psbH</i>     | Photosynthesis | PSII (1)                      | 3                           | 3360,02                   | 20,76                      | -7,34                | *                                  |
| <i>psbB</i>     | Photosynthesis | PSII (1)                      | 3                           | 3324,20                   | 19,53                      | -7,41                | *                                  |
| <i>psbL</i>     | Photosynthesis | PSII (1)                      | 2                           | 3473,34                   | 19,54                      | -7,47                | *                                  |
| <i>psbA</i>     | Photosynthesis | PSII (1)                      | -                           | 26943,89                  | 146,18                     | -7,53                | *                                  |
| <i>psbZ</i>     | Photosynthesis | PSII (1)                      | 1                           | 5742,05                   | 23,57                      | -7,93                | *                                  |
| <i>psbK</i>     | Photosynthesis | PSII (1)                      | 7                           | 4463,10                   | 16,66                      | -8,07                | *                                  |
| <i>psbI</i>     | Photosynthesis | PSII (1)                      | 7                           | 2661,86                   | 8,45                       | -8,30                | *                                  |
| <i>psbC</i>     | Photosynthesis | PSII (1)                      | 1                           | 9349,12                   | 18,23                      | -9,00                | *                                  |
| <i>psbF</i>     | Photosynthesis | PSII (1)                      | 2                           | 3456,84                   | 5,62                       | -9,27                | *                                  |
| <i>psbT</i>     | Photosynthesis | PSII (1)                      | 3                           | 3404,68                   | 4,79                       | -9,47                | *                                  |
| <i>psbD</i>     | Photosynthesis | PSII (1)                      | 1                           | 8586,41                   | 11,75                      | -9,51                | *                                  |
| <i>psbM</i>     | Photosynthesis | PSII (1)                      | -                           | 2546,98                   | 3,31                       | -9,59                | *                                  |
| <i>psbE</i>     | Photosynthesis | PSII (1)                      | 2                           | 1632,90                   | 1,36                       | -10,23               | *                                  |
| <i>ycf3</i>     | Photosynthesis | PSI (2)                       | -                           | 1191,01                   | 274,48                     | -2,12                | *                                  |
| <i>ycf4</i>     | Photosynthesis | PSI (2)                       | -                           | 654,62                    | 27,68                      | -4,56                | *                                  |
| <i>psaI</i>     | Photosynthesis | PSI (2)                       | -                           | 1906,80                   | 47,32                      | -5,33                | *                                  |
| <i>psaJ</i>     | Photosynthesis | PSI (2)                       | -                           | 1483,35                   | 20,28                      | -6,19                | *                                  |
| <i>psaC</i>     | Photosynthesis | PSI (2)                       | 5                           | 4090,50                   | 51,86                      | -6,30                | *                                  |
| <i>psaB</i>     | Photosynthesis | PSI (2)                       | 8                           | 5012,74                   | 24,48                      | -7,68                | *                                  |
| <i>psaA</i>     | Photosynthesis | PSI (2)                       | 8                           | 3419,98                   | 14,38                      | -7,89                | *                                  |
| <i>petA</i>     | Photosynthesis | Cytb <sub>6</sub> f (3)       | -                           | 615,66                    | 34,63                      | -4,15                | *                                  |
| <i>petN</i>     | Photosynthesis | Cytb <sub>6</sub> f (3)       | -                           | 857,87                    | 2,98                       | -8,17                | *                                  |
| <i>petG</i>     | Photosynthesis | Cytb <sub>6</sub> f (3)       | -                           | 4912,08                   | 12,90                      | -8,57                | *                                  |
| <i>petD</i>     | Photosynthesis | Cytb <sub>6</sub> f (3)       | 3                           | 5498,95                   | 11,24                      | -8,93                | *                                  |
| <i>petB</i>     | Photosynthesis | Cytb <sub>6</sub> f (3)       | 3                           | 6695,76                   | 11,61                      | -9,17                | *                                  |
| <i>atpF</i>     | Photosynthesis | ATPase (4)                    | 9                           | 1528,47                   | 88,85                      | -4,10                | *                                  |
| <i>atpH</i>     | Photosynthesis | ATPase (4)                    | 9                           | 2110,63                   | 105,63                     | -4,32                | *                                  |
| <i>atpI</i>     | Photosynthesis | ATPase (4)                    | 9                           | 1517,74                   | 49,60                      | -4,94                | *                                  |
| <i>atpB</i>     | Photosynthesis | ATPase (4)                    | 4                           | 454,87                    | 11,51                      | -5,30                | *                                  |
| <i>atpE</i>     | Photosynthesis | ATPase (4)                    | 4                           | 968,47                    | 17,59                      | -5,78                | *                                  |
| <i>atpA</i>     | Photosynthesis | ATPase (4)                    | 9                           | 864,48                    | 9,98                       | -6,44                | *                                  |
| <i>ndhF</i>     | Photosynthesis | NAD(P)H DH (5)                | -                           | 52,63                     | 8,48                       | -2,63                | *                                  |
| <i>ndhH</i>     | Photosynthesis | NAD(P)H DH (5)                | 5                           | 257,98                    | 31,57                      | -3,03                | *                                  |
| <i>ndhB</i>     | Photosynthesis | NAD(P)H DH (5)                | -                           | 366,95                    | 43,96                      | -3,06                | *                                  |
| <i>ndhK</i>     | Photosynthesis | NAD(P)H DH (5)                | 6                           | 331,86                    | 16,28                      | -4,35                | *                                  |
| <i>ndhG</i>     | Photosynthesis | NAD(P)H DH (5)                | 5                           | 352,47                    | 10,40                      | -5,08                | *                                  |
| <i>ndhA</i>     | Photosynthesis | NAD(P)H DH (5)                | 5                           | 1220,83                   | 26,44                      | -5,53                | *                                  |
| <i>ndhE</i>     | Photosynthesis | NAD(P)H DH (5)                | 5                           | 1523,54                   | 32,16                      | -5,57                | *                                  |
| <i>ndhD</i>     | Photosynthesis | NAD(P)H DH (5)                | 5                           | 512,14                    | 10,55                      | -5,60                | *                                  |
| <i>ndhI</i>     | Photosynthesis | NAD(P)H DH (5)                | 5                           | 1895,56                   | 37,68                      | -5,65                | *                                  |
| <i>ndhC</i>     | Photosynthesis | NAD(P)H DH (5)                | 6                           | 455,09                    | 2,91                       | -7,29                | *                                  |
| <i>rbcL</i>     | Photosynthesis | Rubisco (6)                   | -                           | 22038,00                  | 72,48                      | -8,25                | *                                  |
| <i>cemA</i>     | Photosynthesis | Others (7)                    | -                           | 476,46                    | 13,92                      | -5,10                | *                                  |
| <b>Average</b>  |                |                               |                             | <b>3435.05</b>            | <b>35.04</b>               | <b>-6,46</b>         |                                    |
| <i>trnV-GAC</i> | Genetic system | tRNA (9)                      | -                           | 128,26                    | 37,50                      | -1,77                | *                                  |
| <i>trnR-ACG</i> | Genetic system | tRNA (9)                      | -                           | 515,12                    | 92,23                      | -2,48                | *                                  |
| <i>trnI-CAU</i> | Genetic system | tRNA (9)                      | -                           | 58,81                     | 9,67                       | -2,61                | *                                  |
| <i>trnI-GAU</i> | Genetic system | tRNA (9)                      | 13                          | 1816,07                   | 204,07                     | -3,15                | *                                  |

| Gene             | Group          | Complexes (code) <sup>a</sup> | Operons (code) <sup>b</sup> | Average Leaf <sup>c</sup> | Average Tuber <sup>c</sup> | Log <sub>2</sub> T/L | Significance FDR Test <sup>d</sup> |
|------------------|----------------|-------------------------------|-----------------------------|---------------------------|----------------------------|----------------------|------------------------------------|
| <i>trnA-UGC</i>  | Genetic system | tRNA (9)                      | 13                          | 1152,00                   | 124,92                     | -3,21                | *                                  |
| <i>trnM-CAU</i>  | Genetic system | tRNA (9)                      | -                           | 219,30                    | 16,31                      | -3,75                | *                                  |
| <i>trnV-UAC</i>  | Genetic system | tRNA (9)                      | -                           | 918,10                    | 59,78                      | -3,94                | *                                  |
| <i>trnQ-UGG</i>  | Genetic system | tRNA (9)                      | -                           | 2615,63                   | 122,28                     | -4,42                | *                                  |
| <i>trnD-GUC</i>  | Genetic system | tRNA (9)                      | 10                          | 7111,00                   | 318,43                     | -4,48                | *                                  |
| <i>trnG-GCC</i>  | Genetic system | tRNA (9)                      | -                           | 663,47                    | 26,40                      | -4,65                | *                                  |
| <i>trnfM-CAU</i> | Genetic system | tRNA (9)                      | -                           | 549,52                    | 18,57                      | -4,89                | *                                  |
| <i>trnP-UGG</i>  | Genetic system | tRNA (9)                      | -                           | 996,36                    | 31,54                      | -4,98                | *                                  |
| <i>trnS-GCU</i>  | Genetic system | tRNA (9)                      | -                           | 165,06                    | 5,07                       | -5,02                | *                                  |
| <i>trnT-UGU</i>  | Genetic system | tRNA (9)                      | -                           | 208,89                    | 6,42                       | -5,02                | *                                  |
| <i>trnS-GGA</i>  | Genetic system | tRNA (9)                      | -                           | 287,97                    | 8,66                       | -5,05                | *                                  |
| <i>trnN-GUU</i>  | Genetic system | tRNA (9)                      | -                           | 3224,20                   | 92,82                      | -5,12                | *                                  |
| <i>trnE-UUC</i>  | Genetic system | tRNA (9)                      | 10                          | 2818,17                   | 64,45                      | -5,45                | *                                  |
| <i>trnY-GUA</i>  | Genetic system | tRNA (9)                      | 10                          | 1917,63                   | 36,00                      | -5,74                | *                                  |
| <i>trnC-GCA</i>  | Genetic system | tRNA (9)                      | -                           | 805,37                    | 14,37                      | -5,81                | *                                  |
| <i>trnK-UUU</i>  | Genetic system | tRNA (9)                      | -                           | 600,11                    | 7,89                       | -6,25                | *                                  |
| <i>trnL-UAG</i>  | Genetic system | tRNA (9)                      | -                           | 34,68                     | 0,42                       | -6,37                | *                                  |
| <i>trnF-GAA</i>  | Genetic system | tRNA (9)                      | -                           | 1726,73                   | 19,79                      | -6,45                | *                                  |
| <i>trnH-GUG</i>  | Genetic system | tRNA (9)                      | -                           | 6557,67                   | 72,87                      | -6,49                | *                                  |
| <i>trnL-CAA</i>  | Genetic system | tRNA (9)                      | -                           | 2653,32                   | 28,06                      | -6,56                | *                                  |
| <i>trnL-UAA</i>  | Genetic system | tRNA (9)                      | -                           | 6981,68                   | 62,73                      | -6,80                | *                                  |
| <i>trnW-CCA</i>  | Genetic system | tRNA (9)                      | -                           | 316,82                    | 2,47                       | -7,00                | *                                  |
| <i>trnT-GGU</i>  | Genetic system | tRNA (9)                      | -                           | 2203,85                   | 16,23                      | -7,09                | *                                  |
| <i>trnS-UGA</i>  | Genetic system | tRNA (9)                      | -                           | 217,58                    | 1,33                       | -7,35                | *                                  |
| <i>trnG-UCC</i>  | Genetic system | tRNA (9)                      | 7                           | 1013,12                   | 5,72                       | -7,47                | *                                  |
| <i>rrn23</i>     | Genetic system | rRNA (10)                     | 13                          | 47145,69                  | 24261,17                   | -0,96                | NS                                 |
| <i>rrn16</i>     | Genetic system | rRNA (10)                     | 13                          | 52077,14                  | 25282,83                   | -1,04                | NS                                 |
| <i>rrn5</i>      | Genetic system | rRNA (10)                     | 13                          | 40814,72                  | 16139,08                   | -1,34                | *                                  |
| <i>rrn4.5</i>    | Genetic system | rRNA (10)                     | 13                          | 48356,24                  | 18222,87                   | -1,41                | *                                  |
| <i>rpl16</i>     | Genetic system | Rpl (11)                      | 11                          | 219,83                    | 58,68                      | -1,91                | *                                  |
| <i>rpl14</i>     | Genetic system | Rpl (11)                      | 11                          | 125,30                    | 20,89                      | -2,58                | *                                  |
| <i>rpl36</i>     | Genetic system | Rpl (11)                      | -                           | 342,48                    | 47,42                      | -2,85                | *                                  |
| <i>rpl22</i>     | Genetic system | Rpl (11)                      | 11                          | 188,79                    | 23,99                      | -2,98                | *                                  |
| <i>rpl2</i>      | Genetic system | Rpl (11)                      | 11                          | 476,00                    | 54,74                      | -3,12                | *                                  |
| <i>rpl23</i>     | Genetic system | Rpl (11)                      | 11                          | 135,35                    | 12,21                      | -3,47                | *                                  |
| <i>rpl33</i>     | Genetic system | Rpl (11)                      | -                           | 204,54                    | 17,11                      | -3,58                | *                                  |
| <i>rpl32</i>     | Genetic system | Rpl (11)                      | -                           | 297,34                    | 20,96                      | -3,83                | *                                  |
| <i>rpl20</i>     | Genetic system | Rpl (11)                      | -                           | 135,21                    | 8,30                       | -4,03                | *                                  |
| <i>rps3</i>      | Genetic system | Rps (12)                      | 11                          | 171,21                    | 39,68                      | -2,11                | *                                  |
| <i>rps12</i>     | Genetic system | Rps (12)                      | -                           | 477,47                    | 107,42                     | -2,15                | *                                  |
| <i>rps4</i>      | Genetic system | Rps (12)                      | -                           | 104,25                    | 23,23                      | -2,17                | *                                  |
| <i>rps7</i>      | Genetic system | Rps (12)                      | -                           | 350,20                    | 68,67                      | -2,35                | *                                  |
| <i>rps15</i>     | Genetic system | Rps (12)                      | -                           | 118,26                    | 13,68                      | -3,11                | *                                  |
| <i>rps19</i>     | Genetic system | Rps (12)                      | 11                          | 199,88                    | 22,56                      | -3,15                | *                                  |
| <i>rps8</i>      | Genetic system | Rps (12)                      | 11                          | 156,90                    | 15,92                      | -3,30                | *                                  |
| <i>rps11</i>     | Genetic system | Rps (12)                      | 11                          | 193,87                    | 18,13                      | -3,42                | *                                  |
| <i>rps2</i>      | Genetic system | Rps (12)                      | 9                           | 251,85                    | 21,15                      | -3,57                | *                                  |
| <i>rps16</i>     | Genetic system | Rps (12)                      | -                           | 889,86                    | 63,33                      | -3,81                | *                                  |
| <i>rps18</i>     | Genetic system | Rps (12)                      | -                           | 250,27                    | 11,54                      | -4,44                | *                                  |
| <i>rps14</i>     | Genetic system | Rps (12)                      | 8                           | 3094,02                   | 8,23                       | -8,55                | *                                  |
| <i>rpoB</i>      | Genetic system | Rpo (13)                      | 12                          | 214,60                    | 244,29                     | 0,19                 | NS                                 |
| <i>rpoC2</i>     | Genetic system | Rpo (13)                      | 12                          | 25,89                     | 11,66                      | -1,15                | NS                                 |
| <i>rpoC1</i>     | Genetic system | Rpo (13)                      | 12                          | 64,84                     | 20,39                      | -1,67                | *                                  |

| Gene                     | Group          | Complexes (code) <sup>a</sup> | Operons (code) <sup>b</sup> | Average Leaf <sup>c</sup> | Average Tuber <sup>c</sup> | Log <sub>2</sub> T/L | Significance FDR Test <sup>d</sup> |
|--------------------------|----------------|-------------------------------|-----------------------------|---------------------------|----------------------------|----------------------|------------------------------------|
| <i>rpoA</i>              | Genetic system | Rpo (13)                      | 11                          | 100,49                    | 13,20                      | -2,93                | *                                  |
| <i>clpP</i>              | Genetic system | Clp (14)                      | -                           | 709,75                    | 356,83                     | -0,99                | *                                  |
| <i>matK</i>              | Genetic system | MatK (15)                     | -                           | 419,82                    | 8,61                       | -5,61                | *                                  |
| <b>Average</b>           |                |                               |                             | <b>4113.14</b>            | <b>1445.76</b>             | <b>-3,95</b>         |                                    |
| <i>accD</i>              | Others         | ACCCase (16)                  | -                           | 118,86                    | 38,40                      | -1,63                | NS                                 |
| <i>ycf2</i>              | Others         | <i>ycf (18)</i>               | -                           | 45,86                     | 28,54                      | -0,68                | NS                                 |
| <i>ycf1</i>              | Others         | <i>ycf (17)</i>               | -                           | 31,37                     | 17,73                      | -0,82                | NS                                 |
| <i>ycf15</i>             | Others         | <i>ycf (19)</i>               | -                           | 87,60                     | 43,56                      | -1,01                | *                                  |
| <b>Average</b>           |                |                               |                             | <b>70.92</b>              | <b>32.06</b>               | <b>-1,04</b>         |                                    |
| <b>Average all genes</b> |                |                               |                             | <b>3684.86</b>            | <b>811.48</b>              | <b>-4.88</b>         |                                    |

<sup>a</sup> PSII, photosystem II; PSI, photosystem I; Cytb<sub>6</sub>f, cytochrome b<sub>6</sub>f complex; ATPase, H<sup>+</sup>-ATP synthase; NAD(P)H DH, NADH dehydrogenase; Rubisco, Ribulose-1,5-bisphosphate carboxylase/oxygenase (Large subunit); Rpl, ribosomal proteins (large subunit); Rps, ribosomal proteins (small subunit); Rpo, plastid encoded polymerase (PEP) subunits; Clp, ATP-dependent protease (proteolytic subunit); MatK, MatK maturase; ACCCase, acetyl-CoA carboxylase (β subunit); *ycf*, hypothetical chloroplast reading frame. Codes as in Fig. 1b.

<sup>b</sup> Operons deduced from tobacco data (Wakasugi et al. 1998). Codes as in Fig. 1c.

<sup>c</sup> Normalized fluorescence units

<sup>d</sup> \*, significant with  $\alpha=0.05$ ; NS, not significant (Benjamini and Hochberg 1995, Reiner et al. 2003)

**Table S2.** Data from microarray analysis with RNA from potato polysomes. Results are ranked according to gene function and decreasing log<sub>2</sub> Tuber/Leaf value.

| Gene           | Group          | Complexes (code) <sup>a</sup> | Operons (code) <sup>b</sup> | Average Leaf <sup>c</sup> | Average Tuber <sup>c</sup> | Log <sub>2</sub> T/L | Significance FDR Test <sup>d</sup> |
|----------------|----------------|-------------------------------|-----------------------------|---------------------------|----------------------------|----------------------|------------------------------------|
| <i>psbN</i>    | Photosynthesis | PSII (1)                      | -                           | 454,39                    | 34,41                      | -3,72                | NS                                 |
| <i>psbM</i>    | Photosynthesis | PSII (1)                      | -                           | 657,58                    | 18,73                      | -5,13                | NS                                 |
| <i>psbE</i>    | Photosynthesis | PSII (1)                      | 2                           | 2789,68                   | 66,18                      | -5,40                | *                                  |
| <i>psbJ</i>    | Photosynthesis | PSII (1)                      | 2                           | 1178,37                   | 19,26                      | -5,93                | *                                  |
| <i>psbL</i>    | Photosynthesis | PSII (1)                      | 2                           | 7200,14                   | 98,02                      | -6,20                | *                                  |
| <i>psbI</i>    | Photosynthesis | PSII (1)                      | 7                           | 4100,30                   | 49,64                      | -6,37                | *                                  |
| <i>psbF</i>    | Photosynthesis | PSII (1)                      | 2                           | 5867,05                   | 66,90                      | -6,45                | *                                  |
| <i>psbK</i>    | Photosynthesis | PSII (1)                      | 7                           | 4277,04                   | 21,09                      | -7,66                | *                                  |
| <i>psbA</i>    | Photosynthesis | PSII (1)                      | -                           | 61759,10                  | 91,93                      | -9,39                | *                                  |
| <i>psbB</i>    | Photosynthesis | PSII (1)                      | 3                           | 37675,27                  | 54,60                      | -9,43                | *                                  |
| <i>psbH</i>    | Photosynthesis | PSII (1)                      | 3                           | 28765,53                  | 40,65                      | -9,47                | *                                  |
| <i>psbD</i>    | Photosynthesis | PSII (1)                      | 1                           | 26373,45                  | 27,25                      | -9,92                | *                                  |
| <i>psbC</i>    | Photosynthesis | PSII (1)                      | 1                           | 17658,39                  | 18,15                      | -9,93                | *                                  |
| <i>psbT</i>    | Photosynthesis | PSII (1)                      | 3                           | 20043,97                  | 17,93                      | -10,13               | *                                  |
| <i>psbZ</i>    | Photosynthesis | PSII (1)                      | 1                           | 21047,87                  | 7,05                       | -11,54               | *                                  |
| <i>ycf3</i>    | Photosynthesis | PSI (2)                       | -                           | 2237,32                   | 490,60                     | -2,19                | NS                                 |
| <i>psaI</i>    | Photosynthesis | PSI (2)                       | -                           | 6914,70                   | 413,78                     | -4,06                | *                                  |
| <i>ycf4</i>    | Photosynthesis | PSI (2)                       | -                           | 3350,36                   | 159,77                     | -4,39                | *                                  |
| <i>psaJ</i>    | Photosynthesis | PSI (2)                       | -                           | 2359,78                   | 74,89                      | -4,98                | *                                  |
| <i>psaC</i>    | Photosynthesis | PSI (2)                       | 5                           | 3847,30                   | 31,98                      | -6,91                | *                                  |
| <i>psaB</i>    | Photosynthesis | PSI (2)                       | 8                           | 31763,63                  | 127,72                     | -7,96                | *                                  |
| <i>psaA</i>    | Photosynthesis | PSI (2)                       | 8                           | 39672,25                  | 159,27                     | -7,96                | *                                  |
| <i>petA</i>    | Photosynthesis | Cytb <sub>6</sub> f (3)       | -                           | 5267,76                   | 232,00                     | -4,50                | *                                  |
| <i>petG</i>    | Photosynthesis | Cytb <sub>6</sub> f (3)       | -                           | 15034,25                  | 162,61                     | -6,53                | *                                  |
| <i>petL</i>    | Photosynthesis | Cytb <sub>6</sub> f (3)       | -                           | 4866,09                   | 50,24                      | -6,60                | *                                  |
| <i>petN</i>    | Photosynthesis | Cytb <sub>6</sub> f (3)       | -                           | 588,81                    | 2,75                       | -7,74                | *                                  |
| <i>petB</i>    | Photosynthesis | Cytb <sub>6</sub> f (3)       | 3                           | 35038,34                  | 141,02                     | -7,96                | *                                  |
| <i>petD</i>    | Photosynthesis | Cytb <sub>6</sub> f (3)       | 3                           | 19428,00                  | 56,36                      | -8,43                | *                                  |
| <i>atpI</i>    | Photosynthesis | ATPase (4)                    | 9                           | 5954,79                   | 295,74                     | -4,33                | *                                  |
| <i>atpF</i>    | Photosynthesis | ATPase (4)                    | 9                           | 9254,09                   | 295,26                     | -4,97                | *                                  |
| <i>atpH</i>    | Photosynthesis | ATPase (4)                    | 9                           | 17446,69                  | 515,74                     | -5,08                | *                                  |
| <i>atpB</i>    | Photosynthesis | ATPase (4)                    | 4                           | 5404,69                   | 90,63                      | -5,90                | *                                  |
| <i>atpE</i>    | Photosynthesis | ATPase (4)                    | 4                           | 5041,46                   | 69,94                      | -6,17                | *                                  |
| <i>atpA</i>    | Photosynthesis | ATPase (4)                    | 9                           | 11890,75                  | 109,16                     | -6,77                | *                                  |
| <i>ndhH</i>    | Photosynthesis | NAD(P)H DH (5)                | 5                           | 1867,11                   | 235,38                     | -2,99                | *                                  |
| <i>ndhB</i>    | Photosynthesis | NAD(P)H DH (5)                | -                           | 1059,28                   | 32,06                      | -5,05                | *                                  |
| <i>ndhF</i>    | Photosynthesis | NAD(P)H DH (5)                | -                           | 232,66                    | 6,12                       | -5,25                | *                                  |
| <i>ndhA</i>    | Photosynthesis | NAD(P)H DH (5)                | 5                           | 5402,86                   | 131,26                     | -5,36                | *                                  |
| <i>ndhI</i>    | Photosynthesis | NAD(P)H DH (5)                | 5                           | 6459,35                   | 149,45                     | -5,43                | *                                  |
| <i>ndhD</i>    | Photosynthesis | NAD(P)H DH (5)                | 5                           | 937,36                    | 19,60                      | -5,58                | *                                  |
| <i>ndhG</i>    | Photosynthesis | NAD(P)H DH (5)                | 5                           | 1743,73                   | 32,36                      | -5,75                | *                                  |
| <i>ndhE</i>    | Photosynthesis | NAD(P)H DH (5)                | 5                           | 2819,21                   | 46,95                      | -5,91                | *                                  |
| <i>ndhC</i>    | Photosynthesis | NAD(P)H DH (5)                | 6                           | 3541,01                   | 19,77                      | -7,48                | *                                  |
| <i>ndhJ</i>    | Photosynthesis | NAD(P)H DH (5)                | 6                           | 1500,97                   | 4,50                       | -8,38                | *                                  |
| <i>ndhK</i>    | Photosynthesis | NAD(P)H DH (5)                | 6                           | 1527,14                   | 0,68                       | -11,13               | *                                  |
| <i>rbcL</i>    | Photosynthesis | Rubisco (6)                   | -                           | 64120,67                  | 387,62                     | -7,37                | *                                  |
| <i>cemA</i>    | Photosynthesis | Others (7)                    | -                           | 3436,97                   | 145,91                     | -4,56                | NS                                 |
| <i>ccsA</i>    | Photosynthesis | Others (8)                    | -                           | 466,86                    | 0,61                       | -9,58                | *                                  |
| <b>Average</b> |                |                               |                             | <b>11673,42</b>           | <b>110,91</b>              | <b>-6,67</b>         |                                    |
| <i>rpl14</i>   | Genetic system | Rpl (11)                      | 11                          | 1313,26                   | 260,98                     | -2,33                | *                                  |

| Gene                     | Group          | Complexes (code) <sup>a</sup> | Operons (code) <sup>b</sup> | Average Leaf <sup>c</sup> | Average Tuber <sup>c</sup> | Log <sub>2</sub> T/L | Significance FDR Test <sup>d</sup> |
|--------------------------|----------------|-------------------------------|-----------------------------|---------------------------|----------------------------|----------------------|------------------------------------|
| <i>rpl22</i>             | Genetic system | Rpl (11)                      | 11                          | 1012,03                   | 167,96                     | -2,59                | *                                  |
| <i>rpl16</i>             | Genetic system | Rpl (11)                      | 11                          | 3362,80                   | 552,21                     | -2,61                | NS                                 |
| <i>rpl36</i>             | Genetic system | Rpl (11)                      | -                           | 2987,15                   | 289,76                     | -3,37                | *                                  |
| <i>rpl20</i>             | Genetic system | Rpl (11)                      | -                           | 1335,90                   | 122,87                     | -3,44                | *                                  |
| <i>rpl2</i>              | Genetic system | Rpl (11)                      | 11                          | 4841,60                   | 397,70                     | -3,61                | *                                  |
| <i>rpl33</i>             | Genetic system | Rpl (11)                      | -                           | 1259,89                   | 86,22                      | -3,87                | NS                                 |
| <i>rpl23</i>             | Genetic system | Rpl (11)                      | 11                          | 1580,93                   | 74,75                      | -4,40                | *                                  |
| <i>rpl32</i>             | Genetic system | Rpl (11)                      | -                           | 246,71                    | 4,66                       | -5,73                | *                                  |
| <i>rps4</i>              | Genetic system | Rps (12)                      | -                           | 525,02                    | 153,33                     | -1,78                | NS                                 |
| <i>rps2</i>              | Genetic system | Rps (12)                      | 9                           | 2415,72                   | 531,89                     | -2,18                | NS                                 |
| <i>rps15</i>             | Genetic system | Rps (12)                      | -                           | 1111,98                   | 197,89                     | -2,49                | NS                                 |
| <i>rps19</i>             | Genetic system | Rps (12)                      | 11                          | 2789,34                   | 409,05                     | -2,77                | *                                  |
| <i>rps3</i>              | Genetic system | Rps (12)                      | 11                          | 2842,96                   | 409,08                     | -2,80                | *                                  |
| <i>rps12</i>             | Genetic system | Rps (12)                      | -                           | 2967,59                   | 348,05                     | -3,09                | *                                  |
| <i>rps8</i>              | Genetic system | Rps (12)                      | 11                          | 1924,71                   | 214,54                     | -3,17                | *                                  |
| <i>rps7</i>              | Genetic system | Rps (12)                      | -                           | 1316,83                   | 123,48                     | -3,41                | *                                  |
| <i>rps11</i>             | Genetic system | Rps (12)                      | 11                          | 1372,87                   | 114,89                     | -3,58                | *                                  |
| <i>rps18</i>             | Genetic system | Rps (12)                      | -                           | 549,61                    | 44,95                      | -3,61                | *                                  |
| <i>rps16</i>             | Genetic system | Rps (12)                      | -                           | 329,40                    | 18,19                      | -4,18                | *                                  |
| <i>rps14</i>             | Genetic system | Rps (12)                      | 8                           | 5934,88                   | 27,28                      | -7,76                | *                                  |
| <i>rpoC2</i>             | Genetic system | Rpo (13)                      | 12                          | 149,56                    | 267,38                     | 0,84                 | NS                                 |
| <i>rpoC1</i>             | Genetic system | Rpo (13)                      | 12                          | 318,23                    | 372,45                     | 0,23                 | NS                                 |
| <i>rpoB</i>              | Genetic system | Rpo (13)                      | 12                          | 404,89                    | 454,15                     | 0,17                 | NS                                 |
| <i>rpoA</i>              | Genetic system | Rpo (13)                      | 11                          | 741,03                    | 58,16                      | -3,67                | *                                  |
| <i>clpP</i>              | Genetic system | Clp (14)                      | -                           | 1501,68                   | 452,82                     | -1,73                | NS                                 |
| <i>matK</i>              | Genetic system | MatK (15)                     | -                           | 717,20                    | 50,07                      | -3,84                | NS                                 |
| <b>Average</b>           |                |                               |                             | <b>1698,29</b>            | <b>229,81</b>              | <b>-2,99</b>         |                                    |
| <i>accD</i>              | Others         | ACCCase (16)                  | -                           | 1292,08                   | 862,64                     | -0,58                | NS                                 |
| <i>ycf1</i>              | Others         | <i>ycf (17)</i>               | -                           | 126,48                    | 132,96                     | 0,07                 | NS                                 |
| <i>ycf2</i>              | Others         | <i>ycf (18)</i>               | -                           | 273,81                    | 114,09                     | -1,26                | NS                                 |
| <i>ycf15</i>             | Others         | <i>ycf (19)</i>               | -                           | 147,58                    | 51,59                      | -1,52                | NS                                 |
| <b>Average</b>           |                |                               |                             | <b>459,99</b>             | <b>290,32</b>              | <b>-0,82</b>         |                                    |
| <b>Average all genes</b> |                |                               |                             | <b>7696,43</b>            | <b>160,63</b>              | <b>-5,11</b>         |                                    |

<sup>a</sup> PSII, photosystem II; PSI, photosystem I; Cytb<sub>6</sub>f, cytochrome b<sub>6</sub>f complex; ATPase, H<sup>+</sup>-ATP synthase; NAD(P)H DH, NAD(P)H dehydrogenase; Rubisco, Ribulose-1,5-bisphosphate carboxylase/oxygenase (Large subunit); Rpl, ribosomal proteins (large subunit); Rps, ribosomal proteins (small subunit); Rpo, plastid encoded polymerase (PEP) subunits; Clp, ATP-dependent protease (proteolytic subunit); MatK, MatK maturase; ACCCase, acetyl-CoA carboxylase (β subunit); *ycf*, hypothetical chloroplast reading frame. Codes as in Fig. 7b.

<sup>b</sup> Operons deduced from tobacco data (Wakasugi et al. 1998). Codes as in Fig. 7c.

<sup>c</sup> Normalized fluorescence units

<sup>d</sup> \*, significant with α=0.05; NS, not significant (Bejamini and Hochberg 1995, Reiner et al. 2003)

**Table S3.** List of primers used for different analyses.

| Sequence <sup>a</sup> | Forward primer                     | Reverse primer                | Use              |
|-----------------------|------------------------------------|-------------------------------|------------------|
| <i>ndhB-A</i>         | 5'-TTGGCCTAATTCTTCTTCTG            | 5'-GCTTGAACCCAATTCTACG        | northern         |
| <i>psbD</i>           | 5'-GTAGGCTGGTCCGGTCTATTGC          | 5'-AGGTTTTTCATGAGGCTGATCT     | northern         |
| <i>rps16-A</i>        | 5'-AGCCGTCTATCGAATCGTTGCA          | 5'-TTAATTGAATTTTCGGTTGATTA    | northern         |
| <i>accD</i>           | 5'-TGGATTTAGGGGCGAAGATC            | 5'-GGGTGATTTTCTCTCCGACT       | northern; run-on |
| <i>clpP-A</i>         | 5'-AACCGACTTTATCGAGAAAGA           | 5'-GGGAATGCTATACGTTTGGT       | northern; run-on |
| <i>psbA-A</i>         | 5'-ACGCGAAAGCGAAAGCCTATG           | 5'-AGATGGAGCTTCGATAGCAGC      | northern; run-on |
| <i>rbcL-A</i>         | 5'-GGTAGCTGCGGAATCTTCTACTG         | 5'-TCCTGAAGCCTCAGGTAGAACAC    | northern; run-on |
| <i>18S-A</i>          | 5'-TAGATAAAAGGTCGACGCGG            | 5'-CCCAAAGTCCAACACTACGAGC     | northern         |
| <i>Actin</i>          | 5'-TACAACGAACTTCGTGTTGCG           | 5'-GCATGTGGCAAAGCATATCC       | Southern         |
| <i>atpB</i>           | 5'-CCAATTAATGTGGCTTGTGAGGT         | 5'-AGGGCAGTCAAACCAACTCTCAT    | run-on           |
| <i>atpH</i>           | 5'-TTAAACAAAAGGATTTGCAA            | 5'-ATGAATCCACTGATTTCCGC       | run-on           |
| <i>matK</i>           | 5'-TCCACAGATATTTACAGCCA            | 5'-TCCGACTTCTATATACTCCC       | run-on           |
| <i>ndhG</i>           | 5'-TATTGACGAGCTACAGCAATTGC         | 5'-ATGGATTTATCTGAACCAATACA    | run-on           |
| <i>ndhI</i>           | 5'-TGACATTGGTAAGCGACCCA            | 5'-GTCAACAAAACAATACGAGCC      | run-on           |
| <i>petA</i>           | 5'-GGCTAAAGAAACAGATTACTCGATC       | 5'-TCGGAAAACAAGAAGTTCTGGTCCGG | run-on           |
| <i>petN</i>           | 5'-CGTTCTTTTTGACTCTGCGC            | 5'-CTAGAGTCCACTCCTTCCCC       | run-on           |
| <i>psaA</i>           | 5'-ACATTTCCGGTCAACTCTCCATCA        | 5'-CACGAAAAGTAAGAAAGTCCGCA    | run-on           |
| <i>psbC</i>           | 5'-GTGACCAAGAAACCACAGGT            | 5'-GCTTGAGAAGCTTCTGGTCC       | run-on           |
| <i>psbZ</i>           | 5'-GACTCTTGCTTTCCAATTGG            | 5'-TCAAGAGATGAGAGAATTAAGG     | run-on           |
| <i>rpoB</i>           | 5'-TGTATCCGCGGGATTAATTTGGA         | 5'-ATCAAGGTTTCAGTCTTCGGTTCA   | run-on           |
| <i>rpoC1-A</i>        | 5'-TGTATAGCTTCTTCGATTTT            | 5'-GGATTGCCTCGTGAAATAGC       | run-on           |
| <i>rpoC1-B</i>        | 5'-TCGCAGTATACTAGGCCTTC            | 5'-ATGAATAATAATTTTCTTC        | run-on           |
| <i>rpoC2-A</i>        | 5'-GTGGTGGAAACAAAATATCTC           | 5'-GTGATACGATCAGCTAAGCC       | run-on           |
| <i>rpoC2-B</i>        | 5'-CGAATAGAGATTGGTTGTGC            | 5'-CACAAATAAGCGATAGACGG       | run-on           |
| <i>rps14</i>          | 5'-CGCCCCTCCACCCTATCTGTA           | 5'-CTTCTATTTCTACATCTAGGATTC   | run-on           |
| <i>rps2</i>           | 5'-GAACGACCCTCACAAATTGC            | 5'-ATATTGGAACATAAATTTGG       | run-on           |
| <i>rps3</i>           | 5'-ACTTGCTTCAGACTGGGTAC            | 5'-TGTAGGGGAACCTGCCTTC        | run-on           |
| <i>rps4</i>           | 5'-TTAAGTCTGACGAGAATAAT            | 5'-ATGTCGCGTTACCGAGGACC       | run-on           |
| <i>rrn16-A</i>        | 5'-GCAATAGCTTACCAAGCGCATGA         | 5'-TTCATTCTTGCGAACGTACTCCC    | run-on           |
| <i>rrn23</i>          | 5'-ATCCGGAGATTCCCGAATAG            | 5'-GGTAGTCCGCATCTTCACAG       | run-on           |
| <i>ycf1</i>           | 5'-CTCACCTTACAGAGACAGGC            | 5'-CCCATTGTTGGTCCAATTCGGTG    | run-on           |
| <i>ycf2-A</i>         | 5'-ACCCAATTC AATTCAGTGGG           | 5'-TTCGAACCCAGATGAAGTTC       | run-on           |
| <i>ycf2-B</i>         | 5'-TCGACAGGGTACAAATATCT            | 5'-GGATCGTCCAGTTCCTATAG       | run-on           |
| <i>ycf3-A</i>         | 5'-GGATGTCGGCTCAATCCGAA            | 5'-GTAATGACAGATCACGGCCA       | run-on           |
| <i>ycf3-B</i>         | 5'-GGATAGATCCATGAGAAATCTG          | 5'-CGAAACGTCTCGTGATCTTC       | run-on           |
| <i>atpF</i>           | 5'-AGTGTAGTGCTTGGTGTATTG           | 5'-GTTATTTCTTTTCATTGTTCCC     | RT-PCR           |
| <i>rpl16</i>          | 5'-GATATAATTGCTATGCTTAGT           | 5'-AGGCATTTTAGATGCTGCTAGTG    | RT-PCR           |
| <i>rps16-B</i>        | 5'-CGTTTGAAACGATGTGGTAG            | 5'-ACAGTTTCTGTAGGTTGAGCCC     | RT-PCR           |
| <i>ndhB-B</i>         | 5'-TGTACGGTCTAATGAGGCTACT          | 5'-TGGCCTATGGACGAATATGCAA     | RT-PCR; editing  |
| <i>ndhB-C</i>         | 5'-TGCTTCTCTTCGATGGAAG             |                               | editing          |
| <i>ndhB-D</i>         | 5'-AAGCCTTTCATTTGCTTCTC            |                               | editing          |
| <i>ndhB-E</i>         | 5'-GGCTATCCTGAGCAATTGCA            |                               | editing          |
| <i>ndhB-F</i>         | 5'-CCCTCACGTGCGAAATTATAG           |                               | editing          |
| <i>ndhD-A</i>         | 5'-CATATGGGAGACAGAGGAATAGG         |                               | editing          |
| <i>ndhD-B</i>         | 5'-TACCGACAAACCTGTGCTCGAAA         |                               | editing          |
| <i>clpP-B</i>         | 5'-GAACTTTTGGAACACCAATAGGCAT       |                               | primer extension |
| <i>rbcL-B</i>         | 5'-ACTTGCTT IAGTCTCTGTTTGTGGTGACAT |                               | primer extension |
| <i>rrn16-B</i>        | 5'-AGTTGCATTACTTAGAGC              |                               | primer extension |
| <i>18S-B</i>          | 5'-GGGCATTCGTATTT CATAGTCAGAG      | 5'-CGGTTCTTGATTAATGAAAACATCCT | qRT-PCR          |
| <i>caf1</i>           | 5'-GCGCTTCGATTCTGTCTTA             | 5'-TGAAGGAGTGCCAACGGATT       | qRT-PCR          |
| <i>caf2</i>           | 5'-GGCCTGGGAAGTTGGATAGAG           | 5'-CTTCCGGTGACCCCACTTTT       | qRT-PCR          |
| <i>crr2</i>           | 5'-GATCGAACCAACTCAAGAGCATT         | 5'-CCAGACAGATGCATTAGCTTCAA    | qRT-PCR          |
| <i>crs1</i>           | 5'-GCAGACAAGTTGCTGGAAGGA           | 5'-TCGATAGGCAGTGGCTCACA       | qRT-PCR          |
| <i>crs2</i>           | 5'-TTATTGCCAAAAGGTGGTCATG          | 5'-TGGAAAATCACGGTTCCTTTA      | qRT-PCR          |
| <i>ef1</i>            | 5'-ATTGGAAACGGATATGCTCCA           | 5'-TCCTTACCTGAACGCCTGTCA      | qRT-PCR          |
| <i>EF-Tu</i>          | 5'-TGCCCTGGTCACGCTGATT             | 5'-TCTGCGGCATTGGACCAT         | qRT-PCR          |
| <i>GLK</i>            | 5'-GGCACCTCCAATGCCTCAT             | 5'-AGGAGCCCATGCTGGTGAT        | qRT-PCR          |
| <i>hcf152</i>         | 5'-TAAACAGAGGTGCGGAATGG            | 5'-TCCTTCATCAGGTTCCAATGG      | qRT-PCR          |
| <i>IF3</i>            | 5'-CTTCCATTTTGGGCTTCGA             | 5'-CGTATCGGGCGGAGATAGTG       | qRT-PCR          |
| <i>ndhH</i>           | 5'-CCCTTCTCGTTGCCATTGAA            | 5'-AATGCTACGAGCTTCCGGAAT      | qRT-PCR          |
| <i>pgr3</i>           | 5'-CGGGCGATTGATTTATTGGA            | 5'-CAGAATGCATGAAGCAATGGA      | qRT-PCR          |
| <i>ppr2</i>           | 5'-TGCAGGTGAGGCAAAGCATA            | 5'-CCCCTGATGAGACAGCAAAG       | qRT-PCR          |
| <i>psbA-B</i>         | 5'-AGAGACGCGAAAGCGAAAG             | 5'-CTGGAGGAGCAGCAATGAA        | qRT-PCR          |

| <b>Sequence<sup>a</sup></b> | <b>Forward primer</b>     | <b>Reverse primer</b>     | <b>Use</b> |
|-----------------------------|---------------------------|---------------------------|------------|
| <i>RF2</i>                  | 5'-CAGGTGGAAAGGGAGGTCAAA  | 5'-TCTGTACAGCGAACGGCTACA  | qRT-PCR    |
| <i>Rpl4</i>                 | 5'-GGGCTCCACCACTCTCAATC   | 5'-TGGTGAGCCCACGATGAAC    | qRT-PCR    |
| <i>RpoTp</i>                | 5'-TGAGGTCCGGAAGCAGAGA    | 5'-GCATCCCTGCAAGCAACAG    | qRT-PCR    |
| <i>RRF</i>                  | 5'-GCACCCCTGATGCAAGTTCT   | 5'-TGGCGTCATACCAACATCAGA  | qRT-PCR    |
| <i>Sig1</i>                 | 5'-GGGCGCTCAAGGATGAAGTA   | 5'-CCTCCCAGGTAAGGCACTCA   | qRT-PCR    |
| <i>Sig2</i>                 | 5'-CTCCAAGATCACTTGACCAGAA | 5'-TTCTCCAGGTCCTGTCTCATGA | qRT-PCR    |
| <i>Sig3</i>                 | 5'-CTGAGAGTCGTTGGTTCAAT   | 5'-TGTCTTGCCTCATGACAGTT   | qRT-PCR    |
| <i>Sig4</i>                 | 5'-AACAACCCGTGGCATGGA     | 5'-TCGCGTCCCTAAGAGTTGAA   | qRT-PCR    |
| <i>Sig5</i>                 | 5'-AGCTACTCAGGCTTGCTCTT   | 5'-TCATGCTTCCGTACCATCTC   | qRT-PCR    |
| <i>Sig6</i>                 | 5'-CCAAGGGAGAAGCAGGTTGTT  | 5'-ACGCCATTAACCTACCAATCT  | qRT-PCR    |
| <i>Why1</i>                 | 5'-GGCACACTGCCGTAAATTCCT  | 5'-GCACCTGATCTTGGATTAGCAT | qRT-PCR    |

<sup>a</sup> Different letters following the gene's name indicate different uses for the primers or different amplified regions



**Table S4.** GenBank accession numbers of selected nuclear genes and corresponding potato TIGR TA sequences used for qRT-PCR.

| <b>Gene</b>   | <b>GenBank accession number</b> | <b>TIGR TA accession number</b> |
|---------------|---------------------------------|---------------------------------|
| <i>GLK</i>    | AY028368                        | TA41299_4113                    |
| <i>Sig1</i>   | AB023572                        | TC128451                        |
| <i>Sig2</i>   | At1g08540                       | TA41296_4113                    |
| <i>Sig3</i>   | AB019944                        | TA42763_4113                    |
| <i>Sig4</i>   | At5g13730                       | TA35865_4113                    |
| <i>Sig5</i>   | At5g24120                       | TA42222_4113                    |
| <i>Sig6</i>   | At2g36990                       | BE919893                        |
| <i>RpoTp</i>  | AJ416570                        | TA45411_4113                    |
| <i>Rpl4</i>   | AB010878                        | TA28304_4113                    |
| <i>crr2</i>   | At3g46790                       | TA47528_4113                    |
| <i>hcf152</i> | At3g09650                       | BQ517191                        |
| <i>Why1</i>   | AF233342                        | -                               |
| <i>crs1</i>   | AF290414                        | BE922744                        |
| <i>crs2</i>   | AF225708                        | TA35373_4113                    |
| <i>caf1</i>   | AY264368                        | TA48769_4113                    |
| <i>caf2</i>   | AY264369                        | CK863778                        |
| <i>pgr3</i>   | At4g31850                       | BG594387                        |
| <i>ppr2</i>   | AY278988                        | TA28412_4113                    |
| <i>IF3</i>    | At4g30690                       | TA28082_4113                    |
| <i>EF-Tu</i>  | M94204                          | TA27167_4113                    |
| <i>RF2</i>    | AJ635428                        | DN922351                        |
| <i>RRF</i>    | AJ133751                        | TA34759_4113                    |

### **Literature cited**

- Benjamini Y, Hochberg Y** (1995) Controlling the false discovery rate: a practical and powerful approach to multiple testing. *J R Stat Soc Ser B* **57**: 289-300
- Reiner A, Yekutieli D, Benjamini Y** (2003) Identifying differentially expressed genes using false discovery rate controlling procedures. *Bioinformatics* **19**: 368-375
- Thimm O, Bläsing O, Gibon Y, Nagel A, Meyer S, Krüger P, Selbig J, Müller LA, Rhee SY, Stitt M** (2004) MAPMAN: a user-driven tool to display genomics data sets onto diagrams of metabolic pathways and other biological processes. *Plant J* **37**: 914-939
- Wakasugi T, Sugita M, Tsudzuki T, Sugiura M** (1998) Update gene map of tobacco chloroplast DNA. *Plant Mol Biol Rep* **16**: 231-241
